# Supplementary material for: In Vitro Assessment of Antimicrobial Activity of Phytobiotics Composition towards of Avian Pathogenic Escherichia coli (APEC) and Other E. coli Strains Isolated from Broiler Chickens
Source: MDPI journal article supplement (doi:10.3390/antibiotics11121818), 2022-12-15
Supplement: s1 [file s1]

# ***In vitro* assessment of antimicrobial activity of phytobiotics composition containing menthol, limonen, thymol, *p*-cymene, *trans*-anethole, methyl salicylate, terpinen-4-ol and $\gamma$ -terpinene towards of Avian Pathogenic *Escherichia coli* (APEC) and other *E. coli* strains isolated from broiler chickens.**

Karolina Chodkowska<sup>1,2,\*</sup>, Hubert Iwiński<sup>2,3</sup>, Karolina Wódz<sup>4</sup>, Tomasz Nowak<sup>4</sup>, Henryk Różański

Table of content

Table S1. Antibiotic phenotype pattern, distribution of resistance genes, virulence genes and Multiple Antibiotic Resistance Index (MAR Index) amongst *Escherichia coli* isolates from poultry samples. .... 2

Table S2 Description of primer sets, annealing temperature and product size for antimicrobial genes . 4

**Table S1.** Antibiotic phenotype pattern, distribution of resistance genes, virulence genes and Multiple Antibiotic Resistance Index (MAR Index) amongst *Escherichia coli* isolates from poultry samples.

| Sample origin              | Antibiotic phenotype pattern          | Resistance Genes                                                        | Virulence Genes                                   | MAR index |
|----------------------------|---------------------------------------|-------------------------------------------------------------------------|---------------------------------------------------|-----------|
| chick<br>APEC              | AMX                                   | <i>bla<sub>SHV</sub></i>                                                | <i>astA, iss, irp2, cvi/cva, iucD, vat, iutA</i>  | 0.04      |
|                            | AMX-CPH-DOX-OXY-FLR                   | <i>bla<sub>SHV</sub>, tetA, tetB, floR</i>                              | <i>astA, iss, irp2, papC, iucD, vat, ompT</i>     | 0.2       |
|                            | AMX-STR-NOR-DOX-OXY                   | <i>bla<sub>SHV</sub>, aadA, strA/strB, tetA, tetB</i>                   | <i>astA, iss, irp2, papC, tsh, vat, ompT</i>      | 0.2       |
|                            | AMX-CPH-STR-NOR-TR/SMX                | <i>bla<sub>SHV</sub>, aadA, strA/strB</i>                               | <i>astA, iss, irp2, papC, iucD, vat, iutA</i>     | 0.2       |
|                            | AMX-STR-NOR-FLR-TR/SMX                | <i>bla<sub>SHV</sub>, aadA, strA/strB, floR</i>                         | <i>astA, iss, irp2, cvi/cva, iucD, tsh, iutA</i>  | 0.24      |
|                            | AMX-STR-DOX-OXY-LIN/SP-TR/SMX         | <i>bla<sub>SHV</sub>, aadA, strA/strB, tetA, tetB, sul1</i>             | <i>astA, iss, irp2, papC, cvi/cva, iucD, vat</i>  | 0.28      |
|                            | AMX-CPH-GEN-NOR-DOX-OXY-TR/SMX        | <i>bla<sub>SHV</sub>, aadB, tetA, tetB, sul1</i>                        | <i>astA, iss, irp2, cvi/cva, iucD, tsh, iutA</i>  | 0.28      |
|                            | AMX-CPH-STR-ENR-NOR-LIN/SP-TR/SMX     | <i>bla<sub>SHV</sub>, aadA, strA/strB, sul1, sul2</i>                   | <i>astA, iss, irp2, cvi/cva, iucD, tsh, iutA</i>  | 0.28      |
|                            | AMX-AMX/CL-STR-NOR-DOX-OXY-TR/SMX     | <i>bla<sub>SHV</sub>, aadA, strA/strB, tetA, tetB, sul1</i>             | <i>astA, iss, irp2, papC, iucD, vat, iutA</i>     | 0.28      |
| broiler<br>chicken<br>APEC | AMX-GEN-STR-NOR-DOX-OXY-LIN/SP-TR/SMX | <i>bla<sub>SHV</sub>, aadB, aadA, strA/strB, tetA, tetB, sul1, sul2</i> | <i>astA, iss, irp2, cvi/cva, iucD, tsh, iutA</i>  | 0.32      |
|                            | AMX                                   | <i>bla<sub>SHV</sub></i>                                                | <i>astA, iss, irp2, cvi/cva, iucD, vat, iutA</i>  | 0.04      |
|                            | ENR-NOR                               | -                                                                       | <i>astA, iss, irp2, cvi/cva, iucD, tsh, iutA</i>  | 0.08      |
|                            | DOX-OXY                               | <i>bla<sub>SHV</sub>, tetA, tetB</i>                                    | <i>astA, iss, irp2, papC, cvi/cva, iucD, iutA</i> | 0.08      |
|                            | AMX-CPH-STR                           | <i>bla<sub>SHV</sub>, aadA, strA/strB</i>                               | <i>astA, iss, irp2, papC, cvi/cva, iucD, iutA</i> | 0.12      |
|                            | AMX-CPH-ENR-NOR                       | <i>bla<sub>SHV</sub></i>                                                | <i>astA, iss, irp2, cvi/cva, iucD, tsh, iutA</i>  | 0.16      |
|                            | AMX-CPH-STR-NOR-TR/SMX                | <i>bla<sub>SHV</sub>, aadA, strA/strB, sul1, sul2</i>                   | <i>astA, iss, irp2, papC, iucD, vat, iutA</i>     | 0.2       |
|                            | AMX-CPH-DOX-OXY-FLR                   | <i>bla<sub>SHV</sub>, tetA, tetB, floR</i>                              | <i>astA, iss, irp2, papC, iucD, vat, ompT</i>     | 0.2       |
|                            | AMX-CPH-STR-LIN/SP-TR/SMX             | <i>bla<sub>SHV</sub>, aadA, strA/strB, sul1, sul2, dfrA1</i>            | <i>astA, iss, irp2, cvi/cva, iucD, iutA, ompT</i> | 0.2       |
|                            | AMX-STR-NOR-FLR-TR/SMX                | <i>bla<sub>SHV</sub>, aadA, strA/strB, floR, sul1, dfrA1</i>            | <i>astA, iss, irp2, cvi/cva, iucD, tsh, iutA</i>  | 0.2       |
|                            | AMX-STR-NOR-DOX-OXY                   | <i>bla<sub>SHV</sub>, aadA, strA/strB</i>                               | <i>astA, iss, irp2, papC, tsh, vat, ompT</i>      | 0.2       |
|                            | NOR-DOX-OXY-FLR-LIN/SP                | <i>tetA, tetB, floR</i>                                                 | <i>astA, iss, irp2, papC, cvi/cva, iucD, iutA</i> | 0.2       |
|                            | AMX-STR-DOX-OXY-LIN/SP-TR/SMX         | <i>bla<sub>SHV</sub>, aadA, strA/strB, tetA, tetB, sul1, sul2, sul3</i> | <i>astA, iss, irp2, papC, cvi/cva, iucD, vat</i>  | 0.24      |

|                                           |                                                                                       |                                                    |      |
|-------------------------------------------|---------------------------------------------------------------------------------------|----------------------------------------------------|------|
| AMX-AMX/CL-STR-NOR-DOX-OXY-TR/SMX         | <i>bla<sub>SHV</sub>, aadA, strA/strB, tetA, tetB, sul1, sul2, dfrA10</i>             | <i>astA, iss, irp2, papC, iucD, vat, iutA</i>      | 0.28 |
| AMX-CPH-GEN-NOR-DOX-OXY-TR/SMX            | <i>bla<sub>SHV</sub>, aadB, tetA, tetB, sul1, sul2, sul3</i>                          | <i>astA, iss, irp2, cvi/cva, iucD, tsh, iutA</i>   | 0.28 |
| AMX-CPH-STR-ENR-NOR-LIN/SP-TR/SMX         | <i>bla<sub>SHV</sub>, aadA, strA/strB, sul1, sul2, sul3, dfrA1</i>                    | <i>astA, iss, irp2, cvi/cva, iucD, tsh, iutA</i>   | 0.28 |
| AMX-CPH-STR-DOX-OXY-FLR-TR/SMX            | <i>bla<sub>SHV</sub>, aadA, strA/strB, tetA, tetB, floR, sul1, sul2, sul3</i>         | <i>astA, iss, irp2, papC, iucD, tsh, iutA</i>      | 0.28 |
| AMX-CPH-STR-DOX-OXY-FLR-TR/SMX            | <i>bla<sub>SHV</sub>, aadA, strA/strB, tetA, tetB, floR, sul1, sul2</i>               | <i>astA, iss, irp2, cvi/cva, iucD, tsh, vat</i>    | 0.28 |
| AMX-STR-DOX-OXY-FLR-LIN/SP-TR/SMX         | <i>bla<sub>SHV</sub>, aadA, strA/strB, tetA, tetB, floR, sul1, sul2, sul3, dfrA12</i> | <i>astA, iss, irp2, cvi/cva, iucD, tsh, iutA</i>   | 0.28 |
| AMX-CPH-STR-DOX-OXY-FLR-LIN/SP-TR/SMX     | <i>bla<sub>SHV</sub>, aadA, strA/strB, tetA, tetB, floR, sul2, sul3</i>               | <i>astA, iss, irp2, papC, iucD, vat, iutA</i>      | 0.32 |
| AMX-GEN-STR-NOR-DOX-OXY-LIN/SP-TR/SMX     | <i>bla<sub>SHV</sub>, aadB, aadA, strA/strB, tetA, tetB, sul1, sul2, sul3</i>         | <i>astA, iss, irp2, cvi/cva, iucD, tsh, iutA</i>   | 0.32 |
| AMX-STR-ENR-NOR-DOX-OXY-FLR-LIN/SP        | <i>bla<sub>SHV</sub>, aadA, strA/strB, tetA, tetB, floR</i>                           | <i>astA, iss, irp2, papC, iucD, tsh, vat, iuaT</i> | 0.32 |
| AMX-CPH-STR-ENR-NOR-DOX-OXY-FLR-TR/SMX    | <i>bla<sub>SHV</sub>, aadA, strA/strB, tetA, tetB, floR, sul1, sul2, sul3</i>         | <i>astA, iss, irp2, papC, iucD, vat, iutA</i>      | 0.36 |
| AMX-CPH-STR-ENR-NOR-DOX-OXY-FLR-TR/SMX    | <i>bla<sub>SHV</sub>, aadA, strA/strB, tetA, tetB, floR, sul1, sul2, sul3</i>         | <i>astA, iss, irp2, papC, iucD, tsh, vat,</i>      | 0.36 |
| AMX-CPH-ENR-NOR-DOX-OXY-FLR-LIN/SP-TR/SMX | <i>bla<sub>SHV</sub>, tetA, tetB, floR, dfrA1, dfrA10</i>                             | <i>astA, iss, irp2, cvi/cva, iucD, tsh, iutA</i>   | 0.36 |

Letter abbreviations correspond to the individual antibiotics according to list: amoxicillin (AMX), amoxicillin and clavulanic acid (AMX/CL), , cefapirin (CPH), gentamicin (GEN), nstreptomycin (STR), enrofloxacin (ENR), norfloxacin (NOR), docycycline (DOX), oxytetracycline (OXY), florfenicol (FLR), lincomycin/specinacin (LIN/SP), trimethoprim-sulfamethoxazole (TR/SMX).

**Table S2** Description of primer sets, annealing temperature and product size for antimicrobial genes

| Multiplex PCR or<br>single PCR | Gene/antibiotic            | Primer sequences 5' - 3'       | Annealing<br>temperature | PCR Product<br>Size (bp) |
|--------------------------------|----------------------------|--------------------------------|--------------------------|--------------------------|
| <b>Multiplex 1</b>             | <i>aadA</i>                | F - GTG GAT GGC GGC CTG AAG CC | 63 °C                    | 525 bp                   |
|                                | streptomycin               | R - AAT GCC CAG TCG GCA GCG    |                          |                          |
| <b>Multiplex 1</b>             | <i>strA/strB</i>           | F - ATG GTG GAC CCT AAA ACT CT | 63 °C                    | 893 bp                   |
|                                | streptomycin               | R - CGT CTA GGA TCG AGA CAA AG |                          |                          |
| <b>Multiplex 2</b>             | <i>aphA1</i>               | F - ATG GGC TCG CGA TAA TGT C  | 55 °C                    | 634 bp                   |
|                                | neomycin                   | R - CTC ACC GAG GCA GTT CCA T  |                          |                          |
| <b>Multiplex 2</b>             | <i>aphA2</i>               | F - GAT TGA ACA AGA TGG ATT GC | 55 °C                    | 347 bp                   |
|                                | neomycin                   | R - CCA TGA TGG ATA CTT TCT CG |                          |                          |
| <b>Multiplex 2</b>             | <i>aadB</i>                | F - GAG GAG TTG GAC TATGGA TT  | 55 °C                    | 208 bp                   |
|                                | gentamicin                 | R - CTT CAT CGG CAT AGT AAA AG |                          |                          |
| <b>Multiplex 3</b>             | <i>tetA</i>                | F - GGC GGT CTT CTT CAT CAT GC | 63 °C                    | 502 bp                   |
|                                | tetracycline               | R - CGG CAG GCA GAG CAA GTA GA |                          |                          |
| <b>Multiplex 3</b>             | <i>tetB</i>                | F - CGC CCA GTG CTG TTG TTG TC | 63 °C                    | 173 bp                   |
|                                | tetracycline               | R - CGC GTT GAG AAG CTG AGG TG |                          |                          |
| <b>Multiplex 4</b>             | <i>sul1</i>                | F - CGG CGT GGG CTA CCT GAA CG | 66 °C                    | 433 bp                   |
|                                | sulfamethoxazole           | R - GCC GAT CGC GTG AAG TTC CG |                          |                          |
| <b>Multiplex 4</b>             | <i>sul2</i>                | F - CGG CAT CGT CAA CAT AAC CT | 66 °C                    | 721 bp                   |
|                                | sulfamethoxazole           | R - TGT GCG GAT GAA GTC AGC TC |                          |                          |
| <b>Single PCR</b>              | <i>sul3</i>                | F - GGGAGCCGCTTCCAGTAAT        | 60 °C                    | 500 bp                   |
|                                | sulfamethoxazole           | R - TCCGTGACACTGCAATCATTA      |                          |                          |
| <b>Single PCR</b>              | <i>dfrA1</i>               | F - CAATGGCTGTTGGTTGGAC        | 62 °C                    | 253 bp                   |
|                                | trimethoprim               | R - CCGGCTCGATGTCTATTGT        |                          |                          |
| <b>Single PCR</b>              | <i>dfrA10</i>              | F - TCAAGGCAAATTACCTTGGC       | 59 °C                    | 433 bp                   |
|                                | trimethoprim               | R - ATCTATTGGATCACCTACCC       |                          |                          |
| <b>Single PCR</b>              | <i>dfrA12</i>              | F - TTCGCAGACTCACTGAGGG        | 63 °C                    | 330 bp                   |
|                                | trimethoprim               | R - CGGTTGAGACAAGCTCGAAT       |                          |                          |
| <b>Single PCR</b>              | <i>floR</i>                | F - CACGTTGAGCCTCTATATGG       | 61 °C                    | 888 bp                   |
|                                | florfenicol                | R - ATGCAGAAGTAGAACGCGAC       |                          |                          |
| <b>Multiplex 5</b>             | <i>bla<sub>TEM</sub></i>   | F - TTAAGTGGCGAACTACTTAC       | 55 °C                    | 247 bp                   |
|                                | ampicillin                 | R - GTCTATTTCGTTTCATCCATA      |                          |                          |
| <b>Multiplex 5</b>             | <i>bla<sub>SHV</sub></i>   | F - AGGATTGACTGCCTTTTGG        | 55 °C                    | 393 bp                   |
|                                | amoxicillin                | R - ATTTGCTGATTTCGCTCG         |                          |                          |
| <b>Multiplex 5</b>             | <i>bla<sub>CMY-2</sub></i> | F - GACAGCCTCTTTCTCCACA        | 55 °C                    | 1000 bp                  |
|                                | ceftiofur                  | R - TGGACACGAAGGCTACGTA        |                          |                          |
| <b>Single PCR</b>              | <i>bla<sub>PSE-1</sub></i> | F - GCAAGTAGGGCAGGCAATCA       | 60 °C                    | 461 bp                   |
|                                | ampicillin                 | R - GAGCTAGATAGATGCTCACAA      |                          |                          |
| <b>Single PCR</b>              | <i>bla<sub>CTX-M</sub></i> | F - CGCTTTGCGATGTGCAG          | 60 °C                    | 585 bp                   |
|                                |                            | R - ACCGCGATATCGTTGGT          |                          |                          |
